# Supplementary material for: NAT10 as a potential prognostic biomarker and therapeutic target for HNSCC
Source: PubMed Central journal article supplement (PMC8344148; doi:10.1186/s12935-021-02124-2), 2021-08-06

**a**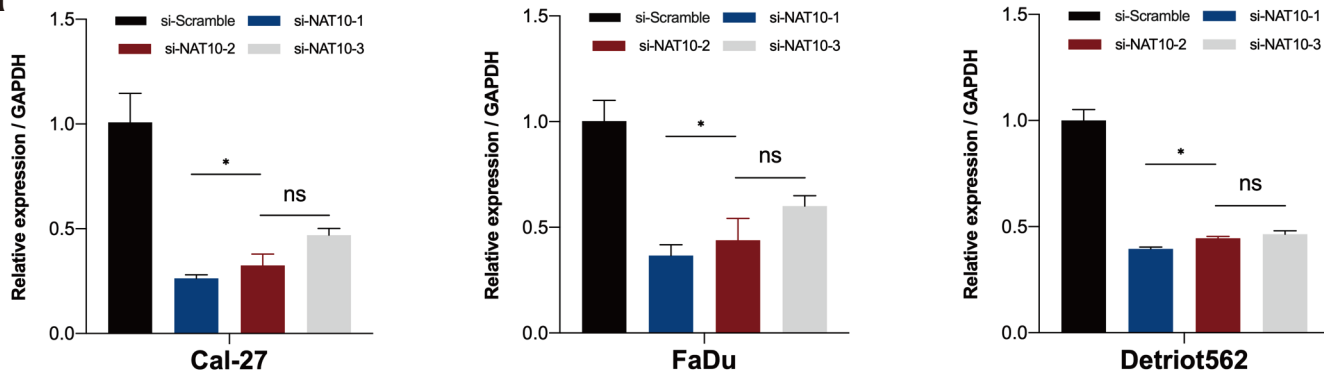**b**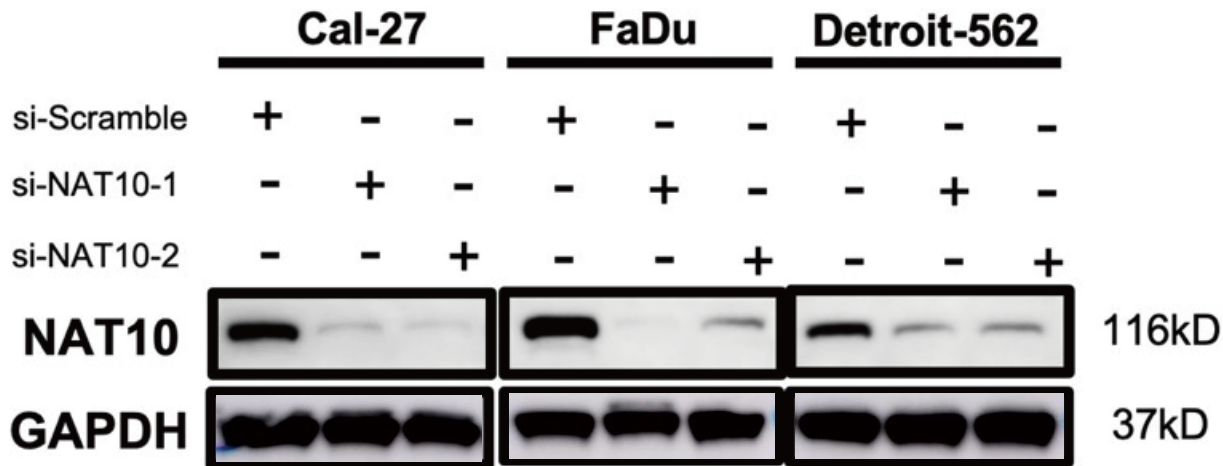

Supplement: 12935_2021_2124_MOESM3_ESM.pdf [file 12935_2021_2124_MOESM3_ESM.pdf]
